# Supplementary material for: Developmental Gene Discovery in a Hemimetabolous Insect: De Novo Assembly and Annotation of a Transcriptome for the Cricket Gryllus bimaculatus
Source: PubMed Central journal article supplement (PMC3646015; doi:10.1371/journal.pone.0061479), 2013-05-06
Supplement: pone.0061479.s004.pdf [file pone.0061479.s004.pdf]

## Sources of animal proteome data used for phylogenetic comparisons of *G. bimaculatus* transcriptome sequence matches

| Species                              | Proteome Source                                                                                                                                                                                                                                     | Download Date |
|--------------------------------------|-----------------------------------------------------------------------------------------------------------------------------------------------------------------------------------------------------------------------------------------------------|---------------|
| <i>Apis mellifera</i>                | <a href="http://hymenopteragenome.org/drupal/sites/hymenopteragenome.org.beebase/files/data/Amel_release1_OGS_pep.fa.gz">http://hymenopteragenome.org/drupal/sites/hymenopteragenome.org.beebase/files/data/Amel_release1_OGS_pep.fa.gz</a>         | 25Mar11       |
| <i>Pediculus humanus</i>             | <a href="ftp://ftp.vectorbase.org/public_data/organism_data/phumanus/Geneset/pediculus_humanus_PhumU1.2.fa.gz">ftp://ftp.vectorbase.org/public_data/organism_data/phumanus/Geneset/pediculus_humanus_PhumU1.2.fa.gz</a>                             | 25Mar11       |
| <i>Anopheles gambiae</i>             | <a href="ftp://ftp.vectorbase.org/public_data/organism_data/agambiae/Geneset/anopheles_gambiae_AgamP3.6.fa.gz">ftp://ftp.vectorbase.org/public_data/organism_data/agambiae/Geneset/anopheles_gambiae_AgamP3.6.fa.gz</a>                             | 25Mar11       |
| <i>Bombyx mori</i>                   | <a href="ftp://silkbdb.org/pub/current/Gene/silkpep.fa.gz">ftp://silkbdb.org/pub/current/Gene/silkpep.fa.gz</a>                                                                                                                                     | 25Mar11       |
| <i>Laupala kohalensis</i> ESTs       | <a href="http://combio.dfci.harvard.edu">http://combio.dfci.harvard.edu</a>                                                                                                                                                                         | 4May11        |
| <i>Locusta migratoria</i> ESTs       | <a href="http://locustdb.genomics.org.cn/download/Locust_EST.zip">http://locustdb.genomics.org.cn/download/Locust_EST.zip</a>                                                                                                                       | 4May11        |
| <i>Tribolium castaneum</i>           | <a href="ftp://bioinformatics.ksu.edu/pub/BeetleBase/3.0/Sequences/Tribolium_Official_Gene_Sequences/peptide.fa">ftp://bioinformatics.ksu.edu/pub/BeetleBase/3.0/Sequences/Tribolium_Official_Gene_Sequences/peptide.fa</a>                         | 25Mar11       |
| <i>Camponotus floridanus</i>         | <a href="http://hymenopteragenome.org/drupal/sites/hymenopteragenome.org.camponotus/files/data/cflo_v3.3.fa">http://hymenopteragenome.org/drupal/sites/hymenopteragenome.org.camponotus/files/data/cflo_v3.3.fa</a>                                 | 25Mar11       |
| <i>Saccharomyces cerevisiae</i>      | <a href="http://downloads.yeastgenome.org/sequence/S288C_reference/orf_protein/orf_trans_all.fasta.gz">http://downloads.yeastgenome.org/sequence/S288C_reference/orf_protein/orf_trans_all.fasta.gz</a>                                             | 4May11        |
| <i>Aedes aegypti</i>                 | <a href="ftp://ftp.vectorbase.org/public_data/organism_data/aaegypti/Geneset/aedes_aegypti_AaegL1.2.fa.gz">ftp://ftp.vectorbase.org/public_data/organism_data/aaegypti/Geneset/aedes_aegypti_AaegL1.2.fa.gz</a>                                     | 25Mar11       |
| <i>Harpegnathos saltator</i>         | <a href="http://hymenopteragenome.org/drupal/sites/hymenopteragenome.org.harpegnathos/files/data/hsal_v3.3.fa.gz">http://hymenopteragenome.org/drupal/sites/hymenopteragenome.org.harpegnathos/files/data/hsal_v3.3.fa.gz</a>                       | 4May11        |
| <i>Culex quinquefasciatus</i>        | <a href="ftp://ftp.vectorbase.org/public_data/organism_data/cquinquefasciatus/Geneset/culex_quinquefasciatus_CpipJ1.2.fa.gz">ftp://ftp.vectorbase.org/public_data/organism_data/cquinquefasciatus/Geneset/culex_quinquefasciatus_CpipJ1.2.fa.gz</a> | 25Mar11       |
| <i>Gallus gallus</i>                 | <a href="ftp://ftp.ncbi.nih.gov/genomes/Gallus_gallus/protein/Gnomon_prot.fsa.gz">ftp://ftp.ncbi.nih.gov/genomes/Gallus_gallus/protein/Gnomon_prot.fsa.gz</a>                                                                                       | 4May11        |
| <i>Nasonia vitripennis</i>           | <a href="http://genomes.arc.georgetown.edu/nasonia/nasonia_genome_consortium/data/Nvit_OGSv1.2_pep.fa.gz">http://genomes.arc.georgetown.edu/nasonia/nasonia_genome_consortium/data/Nvit_OGSv1.2_pep.fa.gz</a>                                       | 25Mar11       |
| <i>Xenopus tropicalis</i>            | <a href="ftp://ftp.ncbi.nih.gov/refseq/X_tropicalis/mRNA_Prot/frog.protein.faa.gz">ftp://ftp.ncbi.nih.gov/refseq/X_tropicalis/mRNA_Prot/frog.protein.faa.gz</a>                                                                                     | 4May11        |
| <i>Ixodes scapularis</i>             | <a href="ftp://ftp.vectorbase.org/public_data/organism_data/iscapularis/Geneset/ixodes_scapularis_IscaW1.1.fa.gz">ftp://ftp.vectorbase.org/public_data/organism_data/iscapularis/Geneset/ixodes_scapularis_IscaW1.1.fa.gz</a>                       | 4May11        |
| <i>Danio rerio</i>                   | <a href="ftp://ftp.ncbi.nih.gov/genomes/D_rerio/protein/Gnomon_prot.fsa.gz">ftp://ftp.ncbi.nih.gov/genomes/D_rerio/protein/Gnomon_prot.fsa.gz</a>                                                                                                   | 4May11        |
| <i>Drosophila melanogaster</i>       | <a href="ftp://ftp.flybase.net/genomes/Drosophila_melanogaster/current/fasta/dmel-all-translation-r5.35.fasta.gz">ftp://ftp.flybase.net/genomes/Drosophila_melanogaster/current/fasta/dmel-all-translation-r5.35.fasta.gz</a>                       | 25Mar11       |
| <i>Mus musculus</i>                  | <a href="ftp://ftp.ncbi.nih.gov/genomes/M_musculus/protein/Gnomon_prot.fsa.gz">ftp://ftp.ncbi.nih.gov/genomes/M_musculus/protein/Gnomon_prot.fsa.gz</a>                                                                                             | 4May11        |
| <i>Homo sapiens</i>                  | <a href="ftp://ftp.ncbi.nih.gov/refseq/H_sapiens/mRNA_Prot/human.protein.faa.gz">ftp://ftp.ncbi.nih.gov/refseq/H_sapiens/mRNA_Prot/human.protein.faa.gz</a>                                                                                         | 4May11        |
| <i>Caenorhabditis elegans</i>        | <a href="ftp://ftp.wormbase.org/pub/wormbase/species/c_elegans/sequence/protein/c_elegans.current.protein.fa.gz">ftp://ftp.wormbase.org/pub/wormbase/species/c_elegans/sequence/protein/c_elegans.current.protein.fa.gz</a>                         | 4May11        |
| <i>Acyrtosiphon pisum</i>            | <a href="http://arthropods.eugenenes.org/aphid/data/geneset1/ACYPIprot.fa.gz">http://arthropods.eugenenes.org/aphid/data/geneset1/ACYPIprot.fa.gz</a>                                                                                               | 25Mar11       |
| <i>Daphnia pulex</i>                 | <a href="ftp://iubio.bio.indiana.edu/daphnia/genome/Daphnia_pulex/current/fasta/dpulex-all-translation-jgi060905.fasta.gz">ftp://iubio.bio.indiana.edu/daphnia/genome/Daphnia_pulex/current/fasta/dpulex-all-translation-jgi060905.fasta.gz</a>     | 11Dec11       |
| <i>Strongylocentrotus purpuratus</i> | <a href="ftp://ftp.ncbi.nih.gov/genomes/Strongylocentrotus_purpuratus/protein/Gnomon_prot.fsa.gz">ftp://ftp.ncbi.nih.gov/genomes/Strongylocentrotus_purpuratus/protein/Gnomon_prot.fsa.gz</a>                                                       | 4May11        |
| <i>Escherichia coli</i>              | <a href="ftp://ftp.ncbi.nih.gov/genomes/Bacteria/Escherichia_coli_K_12_substr_DH10B_uid58979/NC_010473.faa">ftp://ftp.ncbi.nih.gov/genomes/Bacteria/Escherichia_coli_K_12_substr_DH10B_uid58979/NC_010473.faa</a>                                   | 4May11        |
