# Supplementary material for: Developmental Gene Discovery in a Hemimetabolous Insect: De Novo Assembly and Annotation of a Transcriptome for the Cricket Gryllus bimaculatus
Source: PubMed Central journal article supplement (PMC3646015; doi:10.1371/journal.pone.0061479), 2013-05-06
Supplement: pone.0061479.s005.pdf [file pone.0061479.s005.pdf]

Table S2

Contribution of the *G. bimaculatus* transcriptome to existing *G. bimaculatus* GenBank accessions.

| Gene Name                            | Accession # | Accession Sequence Length (nt) | total # nt added by transcriptome | # 5' nt added by transcriptome | # 3' nt added by transcriptome | % Accession lengthened by transcriptome | Transcriptome Read Name | Consensus Region       | Query Location                     |
|--------------------------------------|-------------|--------------------------------|-----------------------------------|--------------------------------|--------------------------------|-----------------------------------------|-------------------------|------------------------|------------------------------------|
| <b>14-3-3epsilon</b>                 | AB443441    | 460                            | 25                                | 25                             | 0                              | 5%                                      | GE8SX9M02IK8UO          | 1-365                  | 1-367                              |
|                                      |             | 460                            | 111                               | 0                              | 111                            | 24%                                     | GFCP6CO02GWC4H          | 425-112                | 151-460                            |
| <b>14-3-3zeta</b>                    | AB443440    | 438                            | 2605                              | 19                             | 2586                           | 595%                                    | isotig03712             | 2597-3034              | full                               |
|                                      |             | 438                            | 2605                              | 19                             | 2586                           | 595%                                    | isotig03711             | 2597-2962              | 73-438                             |
| <b>16s ribosomal</b>                 | AF248685    | 498                            | 207                               | 207                            | 0                              | 42%                                     | GE8SX9M02GQ4TQ          | 208-423,<br>493-533    | 1-215,<br>280-331                  |
|                                      |             | 498                            | 120                               | 0                              | 120                            | 24%                                     | GE8SX9M01ELV4A          | 121-329                | 289-498                            |
| <b>18S ribosomal</b>                 | AF514548    | 1021                           | 175                               | 175                            | 0                              | 17%                                     | isotig14176             | 176-799                | 1-627                              |
|                                      |             | 1021                           | 938                               | 0                              | 938                            | 92%                                     | contig11156             | 939-1037               | 922-1021                           |
| <b>28s ribosomal</b>                 | EU878290    | 726                            | 90                                | 90                             | 0                              | 12%                                     | isotig07604             | 91-377                 | 1-287                              |
|                                      |             | 726                            | 283                               | 283                            | 0                              | 39%                                     | isotig07603             | 284-570                | 1-287                              |
|                                      |             | 726                            | 64                                | 0                              | 64                             | 9%                                      | isotig20138             | 65-144                 | 645-724                            |
| <b>abdominal-A</b>                   | AB194277    | 868                            | 309                               | 309                            | 0                              | 36%                                     | GFCP6CO01AM666          | 310-375,<br>386-458    | 708-780,<br>790-854                |
| <b>accessory gland protein actin</b> | DQ630916    | 570                            | 0                                 | 0                              | 0                              | 0%                                      | GE8SX9M01BFM7Q          | full                   | 19-246                             |
| <b>actin</b>                         | AB087882    | 1290                           | 0                                 | 0                              | 0                              | 0%                                      | GFJY65E02JJW4Q          | 3-391                  | 453-522,<br>874-1024,<br>1106-1275 |
| <b>aristaless</b>                    | AB071147    | 2857                           | 0                                 | 0                              | 0                              | 0%                                      | GFCP6CO01BE1VK          | full                   | 2587-2831                          |
| <b>armadillo protein</b>             | AB109212    | 3836                           | 160                               | 160                            | 0                              | 4%                                      | isotig05341             | 161-2579,<br>2604-3966 | 11-2428,<br>2453-3811              |
| <b>beta-actin</b>                    | DQ630919    | 210                            | 203                               | 138                            | 65                             | 97%                                     | GFJY65E02ICT38          | 66-274                 | 1-210                              |
| <b>chico</b>                         | AB370294    | 440                            | 37                                | 37                             | 0                              | 8%                                      | GFJY65E01AQ60L          | 292-36                 | 7-262                              |
|                                      |             | 440                            | 0                                 | 0                              | 0                              | 0%                                      | GFJY65E01CJM64          | 1-231                  | 35-262                             |
| <b>cyclin B3</b>                     | AB443443    | 802                            | 270                               | 0                              | 270                            | 34%                                     | GE8SX9M02GFOJ4          | 271-368                | 704-802                            |
| <b>cyclin E</b>                      | AB378067    | 209                            | 1276                              | 617                            | 659                            | 611%                                    | isotig01641             | 660-850                | full                               |

|                                                                 |          |      |      |      |      |       |                |                      |                                 |
|-----------------------------------------------------------------|----------|------|------|------|------|-------|----------------|----------------------|---------------------------------|
|                                                                 |          | 209  | 1371 | 712  | 659  | 656%  | isotig01640    | 660-850              | full                            |
|                                                                 |          | 209  | 1446 | 787  | 659  | 692%  | isotig01639    | 660-850              | full                            |
|                                                                 |          | 209  | 3567 | 617  | 2896 | 1707% | isotig01638    | 2897-3087            | full                            |
|                                                                 |          | 209  | 3608 | 712  | 2896 | 1726% | isotig01637    | 2897-3087            | full                            |
|                                                                 |          | 209  | 3683 | 787  | 2896 | 1762% | isotig01636    | 2897-3087            | full                            |
| <b>DHHC-type zinc finger containing protein discs overgrown</b> | AB378066 | 643  | 450  | 450  | 0    | 70%   | isotig14108    | 353-1                | 29-381                          |
|                                                                 | AB443442 | 287  | 3115 | 343  | 2772 | 1085% | isotig01394    | 344-630              | full                            |
|                                                                 |          | 287  | 3211 | 439  | 2772 | 1119% | isotig01393    | 440-726              | full                            |
| <b>ecdysone receptor B1 EF1alpha</b>                            | AB536932 | 828  | 435  | 0    | 435  | 53%   | isotig14153    | 129-364              | 593-828                         |
|                                                                 | AB583234 | 2029 | 101  | 101  | 0    | 5%    | contig12129    | 101-604              | 1-155, 239-421, 490-660         |
|                                                                 |          | 2029 | 116  | 0    | 116  | 6%    | contig12130    | 117-505              | 1466-1543, 1627-1794, 1884-2029 |
| <b>elongation factor</b>                                        | DQ630923 | 717  | 432  | 0    | 432  | 60%   | contig09678    | 433-779              | 371-717                         |
|                                                                 |          | 717  | 910  | 910  | 0    | 127%  | contig09671    | 911-1048             | 1-138                           |
| <b>Ena/VASP</b>                                                 | AB378069 | 200  | 561  | 199  | 362  | 281%  | isotig15279    | 363-515              | 25-177                          |
| <b>enhancer of zeste</b>                                        | AB378079 | 431  | 1938 | 1423 | 515  | 450%  | isotig05120    | 1424-1579, 1637-1854 | 1-218, 276-431                  |
|                                                                 |          | 431  | 2076 | 1423 | 653  | 482%  | isotig05119    | 1424-1579, 1637-1854 | 1-218, 276-431                  |
| <b>expanded</b>                                                 | AB378099 | 648  | 182  | 0    | 182  | 28%   | GFJY65E01B9CAF | 1-284                | 346-629                         |
|                                                                 |          | 648  | 0    | 0    | 0    | 0%    | GFJY65E01DAZCK | full                 | 63-343                          |
| <b>fasciclin-like protein fmr</b>                               | DQ630929 | 768  | 1870 | 935  | 936  | 243%  | isotig09432    | 936-1703             | full                            |
|                                                                 | AB461422 | 1854 | 42   | 42   | 0    | 2%    | isotig06512    | 130-1053             | 88-1011                         |
|                                                                 |          | 1854 | 0    | 0    | 0    | 0%    | isotig17262    | full                 | 1284-1825                       |
| <b>epidermal growth factor receptor</b>                         | AB300616 | 3807 | 0    | 0    | 0    | 0%    | isotig12088    | full                 | 2369-3450                       |
|                                                                 |          | 3807 | 275  | 0    | 275  | 7%    | isotig18881    | 276-456              | 3625-3807                       |
| <b>GB1-cadherin</b>                                             | AB190295 | 4945 | 38   | 38   | 0    | 1%    | isotig04828    | 1164-4545            | 1-3382                          |

|                                       |          |      |      |      |      |       |                |                  |               |
|---------------------------------------|----------|------|------|------|------|-------|----------------|------------------|---------------|
|                                       |          | 4945 | 125  | 0    | 125  | 3%    | isotig10276    | 126-1688         | 3383-4945     |
| <b>GB2-cadherin</b>                   | AB190296 | 4096 | 203  | 203  | 0    | 5%    | GFCP6CO01ER8W2 | 1-176            | 1-176         |
|                                       |          | 4096 | 0    | 0    | 0    | 0%    | FQTBZRY01B5B7K | full             | 875-1011      |
| <b>grainy head</b>                    | AB378081 | 826  | 1244 | 0    | 1244 | 151%  | isotig10851    | 1-225            | 579-803       |
|                                       |          | 826  | 0    | 0    | 0    | 0%    | FQTBZRY02GC2DO | full             | 7-226         |
| <b>Gug gene corepressor Atro 3'</b>   | AB378078 | 192  | 581  | 101  | 480  | 303%  | isotig14567    | 102-166, 232-288 | 6-70, 136-192 |
| <b>Gug gene corepressor Atro 5'</b>   | AB378077 | 179  | 1671 | 1011 | 660  | 934%  | isotig09993    | 1012-1151        | 17-156        |
| <b>hedgehog</b>                       | AB044709 | 2963 | 0    | 0    | 0    | 0%    | GE8SX9M01BZRKW | full             | 2142-2471     |
| <b>hexokinase</b>                     | DQ630934 | 432  | 1539 | 769  | 770  | 356%  | isotig09401    | 770-1201         | full          |
| <b>hippo</b>                          | AB378070 | 632  | 993  | 136  | 857  | 157%  | isotig03128    | 137-768          | full          |
|                                       |          | 632  | 1131 | 136  | 995  | 179%  | isotig03127    | 137-768          | full          |
|                                       |          | 632  | 321  | 136  | 185  | 51%   | isotig03129    | 137-640          | 1-504         |
| <b>hunchback</b>                      | AB120735 | 2672 | 0    | 0    | 0    | 0%    | GFJY65E01C2FLA | full             | 2062-2295     |
|                                       |          | 2672 | 0    | 0    | 0    | 0%    | GE8SX9M02GCICC | full             | 2323-2669     |
| <b>inhibitor of apoptosis protein</b> | AB378071 | 542  | 1253 | 168  | 1085 | 231%  | isotig03633    | 1086-1628        | full          |
|                                       |          | 542  | 2241 | 1156 | 1085 | 413%  | isotig03632    | 1086-1527        | 102-543       |
| <b>Insulin receptor</b>               | AB557977 | 386  | 865  | 431  | 434  | 224%  | isotig04919    | 435-783          | full          |
|                                       |          | 386  | 3991 | 3558 | 434  | 1034% | isotig04918    | 435-783          | full          |
| <b>kibra</b>                          | DC445461 | 677  | 464  | 464  | 0    | 69%   | isotig12669    | 567-971          | 103-507       |
|                                       |          | 677  | 0    | 0    | 0    | 0%    | isotig19618    | full             | 10-560        |
|                                       |          | 677  | 0    | 0    | 0    | 0%    | isotig13198    | full             | 1-669         |
|                                       |          | 677  | 256  | 0    | 256  | 38%   | isotig19193    | 332-285          | 601-648       |
| <b>merlin</b>                         | AB378073 | 539  | 3525 | 3174 | 351  | 654%  | isotig07940    | 3175-3712        | full          |
| <b>mob as tumor suppressor</b>        | AB378072 | 381  | 1482 | 424  | 1058 | 389%  | isotig09892    | 1059-1439        | full          |
| <b>Musashi</b>                        | AB459508 | 354  | 345  | 345  | 0    | 97%   | GFJY65E02G1KQY | 346-415          | 1-70          |
| <b>nitric oxide synthase</b>          | AB477987 | 3535 | 0    | 0    | 0    | 0%    | GE8SX9M02FRE69 | full             | 2233-2676     |
|                                       |          | 3535 | 0    | 0    | 0    | 0%    | GFCP6CO01EGMNE | full             | 2299-2671     |
|                                       |          | 3535 | 0    | 0    | 0    | 0%    | GFJY65E01DHCQJ | full             | 1751-2105     |

|                                                |            |      |      |     |      |      |                |                           |                                |
|------------------------------------------------|------------|------|------|-----|------|------|----------------|---------------------------|--------------------------------|
|                                                |            | 3535 | 163  | 0   | 163  | 5%   | GFJY65E02G0F7L | 1-254                     | 3272-3525                      |
| <b>Notch</b>                                   | AB635585   | 2304 | 0    | 0   | 0    | 0%   | isotig14599    | full                      | 374-1132                       |
|                                                |            | 2304 | 0    | 0   | 0    | 0%   | isotig12243    | full                      | 1595-2300                      |
|                                                |            | 2304 | 0    | 0   | 0    | 0%   | GE8SX9M01BNVPA | full                      | 1145-1566                      |
|                                                |            | 2304 | 194  | 194 | 0    | 8%   | GFCP6CO01B89FU | 198-229                   | 4-35                           |
| <b>orthodenticle1</b>                          | AB468156   | 720  | 599  | 0   | 599  | 83%  | isotig12009    | 1-519                     | 200-707                        |
| <b>period</b>                                  | AB375516   | 3552 | 0    | 0   | 0    | 0%   | isotig11839    | 436-1044                  | 101-701                        |
|                                                |            | 3552 | 0    | 0   | 0    | 0%   | GFCP6CO01E00UQ | 18-150, 509-538           | 1999-2155                      |
| <b>phosphatase and tensin polycomb protein</b> | AB370293   | 490  | 870  | 460 | 410  | 178% | isotig11178    | 411-775                   | full                           |
|                                                | AB444104   | 1333 | 503  | 0   | 503  | 38%  | isotig14622    | 504-761                   | 1062-1319                      |
|                                                |            | 1333 | 0    | 0   | 0    | 0%   | GE8SX9M02FSJ8W | full                      | 789-1059                       |
| <b>Ras association family member</b>           | AB443439   | 442  | 3221 | 133 | 3088 | 729% | isotig05452    | 3089-3530                 | full                           |
|                                                |            | 442  | 133  | 133 | 0    | 30%  | isotig05453    | 305-172                   | 1-134                          |
| <b>s6k</b>                                     | AB557979   | 497  | 2738 | 491 | 2247 | 551% | isotig08277    | 2248-2744                 | full                           |
| <b>S9 ribosomal protein</b>                    | DQ630939   | 552  | 218  | 82  | 136  | 39%  | isotig06773    | 82-626                    | full                           |
|                                                |            | 552  | 408  | 82  | 326  | 74%  | isotig03301    | 82-398                    | 1-420                          |
| <b>salvador</b>                                | AB378074   | 347  | 170  | 170 | 0    | 49%  | GFJY65E01DC652 | 171-477                   | 16-322                         |
| <b>semaphorin 2a</b>                           | EF036538   | 1306 | 203  | 0   | 203  | 16%  | GFJY65E01CQDHA | 1-49                      | 1256-1303                      |
| <b>sex combs reduced Target of rapamycin</b>   | AB194276   | 1015 | 0    | 0   | 0    | 0%   | FQTBZRY02F97XW | 4-34, 112-261             | 382-531, 609-639               |
|                                                | AB557078   | 269  | 230  | 12  | 218  | 86%  | GFCO6CO02JFLMZ | 13-277                    | full                           |
| <b>tgf alpha (EGFR ligand) timeless</b>        | HM106520   | 520  | 1476 | 0   | 1476 | 284% | isotig10026    | 1-323                     | 194-520                        |
|                                                | AB548625.1 | 5795 | 0    | 0   | 0    | 0    | isotig11684    | full                      | 3597-4790                      |
|                                                |            | 5795 | 0    | 0   | 0    | 0    | isotig12618    | full                      | 4793-5784                      |
|                                                |            | 5795 | 0    | 0   | 0    | 0    | isotig13095    | full                      | 2685-3596                      |
|                                                |            | 5795 | 0    | 0   | 0    | 0    | isotig10108    | 1-722, 737-954, 1040-1758 | 622-1339, 1357-1574, 1660-2378 |
|                                                |            | 5795 | 0    | 0   | 0    | 0    | isotig15714    | full                      | 1-591                          |
|                                                |            | 5795 | 0    | 0   | 0    | 0    | GFJY65E01EDCUE | full                      | 2382-2663                      |

|                      |          |      |     |     |     |     |                |                    |                     |
|----------------------|----------|------|-----|-----|-----|-----|----------------|--------------------|---------------------|
| <b>Ultrabithorax</b> | AB194278 | 790  | 0   | 0   | 0   | 0%  | GFJY65E02JHD6P | 361-58, 34-1       | 197-495,<br>519-552 |
|                      |          | 790  | 0   | 0   | 0   | 0%  | GE8SX9M01BU9CB | 1-135, 157-<br>356 | 362-496,<br>519-720 |
| <b>vasa</b>          | AB378065 | 1953 | 420 | 0   | 420 | 22% | isotig11874    | 1146-421           | 1228-1953           |
|                      |          | 1953 | 0   | 0   | 0   | 0%  | isotig14543    | full               | 439-1200            |
| <b>Warts kinase</b>  | AB300574 | 861  | 93  | 93  | 0   | 11% | isotig14894    | 641-1              | 19-659              |
| <b>wingless</b>      | AB044713 | 2298 | 0   | 0   | 0   | 0%  | GE8SX9M01DIP5X | full               | 1610-2075           |
| <b>yorkie</b>        | AB378076 | 1021 | 403 | 403 | 0   | 39% | GFCP6CO03JM8ZY | 404-507            | 1-102               |
