# Supplementary material for: Developmental Gene Discovery in a Hemimetabolous Insect: De Novo Assembly and Annotation of a Transcriptome for the Cricket Gryllus bimaculatus
Source: PubMed Central journal article supplement (PMC3646015; doi:10.1371/journal.pone.0061479), 2013-05-06
Supplement: pone.0061479.s006.pdf [file pone.0061479.s006.pdf]

Table S3

**Transcription factors from the FlyTF database with putative orthologues identified in the *de novo* *G. bimaculatus* transcriptome.**

|        |         |         |        |           |           |        |            |
|--------|---------|---------|--------|-----------|-----------|--------|------------|
| AGO1   | Camta   | CG16778 | CG4617 | CG9305    | Dcr-2     | fd3F   | jim        |
| ab     | cas     | CG16779 | CG4789 | CG9416    | Deaf1     | Fen1   | jing       |
| abo    | caz     | CG16903 | CG4882 | CG9418    | Dhc16F    | fru    | jumu       |
| Acf1   | cdc2    | CG17209 | CG5147 | CG9425    | Dip1      | fry    | kay        |
| Ada2b  | Cdk7    | CG17829 | CG5245 | CG9437    | dl        | fs(1)h | Kdm4A      |
| Alh    | Cdk8    | CG17912 | CG5316 | CG9705    | DLP       | ftz-f1 | Kdm4B      |
| alien  | Cdk9    | CG1832  | CG5343 | CG9817    | dom       | Gas41  | ken        |
| aop    | cg      | CG18619 | CG5380 | CG9890    | Dp        | GATAd  | kin17      |
| Arc42  | CG10289 | CG1965  | CG5591 | CG9932    | Dp1       | gce    | king-tubby |
| ash1   | CG10348 | CG2712  | CG5641 | chinmo    | DppIII    | gcl    | Kr-h1      |
| ash2   | CG10414 | CG2790  | CG5690 | chm       | Dref      | gl     | kto        |
| Asx    | CG10431 | CG31211 | CG5953 | Chrac-14  | Dsp1      | gol    | l(2)37Cg   |
| Atac1  | CG10565 | CG31716 | CG6129 | Chrac-16  | dys       | grh    | l(2)k10201 |
| Atf6   | CG10979 | CG32121 | CG6654 | Chro      | E(bx)     | grn    | l(2)NC136  |
| aub    | CG11414 | CG32343 | CG6686 | cic       | e(r)      | gro    | l(3)mbt    |
| bab2   | CG11456 | CG3281  | CG6701 | Clk       | e(y)1     | grp    | La         |
| bap    | CG11617 | CG32830 | CG6751 | cnc       | e(y)2     | Gug    | lack       |
| Bap170 | CG11710 | CG32982 | CG6765 | Cog7      | e(y)3     | H      | lds        |
| Bap55  | CG11876 | CG3328  | CG6769 | CoRest    | E(z)      | h      | lid        |
| Bap60  | CG12071 | CG33695 | CG6812 | Cp190     | E2f       | hay    | LIMK1      |
| bbx    | CG12162 | CG33785 | CG6905 | crc       | E2f2      | Hcf    | lin-52     |
| bic    | CG12236 | CG33936 | CG6907 | CrebA     | ear       | hep    | Lmpt       |
| bigmax | CG12267 | CG3407  | CG7099 | CrebB-17A | ecd       | Hira   | lola       |
| Bin1   | CG12299 | CG34422 | CG7339 | CREG      | EcR       | HLH106 | lolal      |
| bip2   | CG1233  | CG3680  | CG7368 | crm       | ECSIT     | Hnf4   | Mad        |
| Bka    | CG12370 | CG3711  | CG7556 | croc      | egg       | HP1b   | maf-S      |
| bon    | CG12769 | CG3726  | CG7785 | crol      | Eip74EF   | hpo    | mamo       |
| br     | CG13204 | CG3735  | CG7818 | ct        | Eip78C    | Hr39   | Mat1       |
| brat   | CG13458 | CG3756  | CG7839 | CtBP      | Eip93F    | Hr4    | Max        |
| Brd8   | CG13624 | CG3815  | CG7987 | CTCF      | EloA      | Hr78   | MBD-like   |
| Brf    | CG14200 | CG3838  | CG8152 | CycC      | Elongin-B | Hr96   | MBD-R2     |
| brk    | CG14767 | CG3909  | CG8290 | CycH      | Elp3      | Hsf    | mbf1       |
| brm    | CG14962 | CG40196 | CG8359 | CycT      | emc       | hth    | Med        |
| bs     | CG15011 | CG4042  | CG8578 | CYLD      | ERR       | lswi   | MED1       |
| BtbVII | CG15270 | CG4404  | CG8765 | D12       | Ets97D    | ix     | MED11      |
| bun    | CG15436 | CG4553  | CG8909 | d4        | ewg       | Jarid2 | MED14      |
| Caf1   | CG1620  | CG4557  | CG8924 | dalao     | exd       | JIL-1  | MED15      |

|           |          |           |         |             |            |
|-----------|----------|-----------|---------|-------------|------------|
| MED16     | Mtp      | phtf      | Rpb8    | Spt6        | tld<br>tna |
| MED17     | mTTF     | piwi      | Rpd3    | Ssdp        |            |
| MED18     | mtTFB1   | Pms2      | Rpl1    | Ssl1        | Top2       |
| MED20     | mtTFB2   | pnt       | Rpl12   | Ssrp        | Top3alpha  |
| MED21     | mus201   | polybromo | Rpl135  | Stat92E     | tou        |
| MED22     | mus308   | Pop2      | Rpl140  | stc         | tral       |
| MED23     | mus309   | ppl       | Rpl15   | su(Hw)      | Trax       |
| MED24     | Myb      | pps       | Rpl18   | su(s)       | Trf2       |
| MED25     | N        | Psc       | Rpl1215 | Su(var)2-10 | Trl        |
| MED27     | Nap1     | Psf2      | Rpl133  | Su(var)205  | Trn-SR     |
| MED28     | NC2alpha | psq       | Rpl1128 | Su(var)3-9  | trr        |
| MED30     | nej      | pum       | RpL40   | Su(z)12     | trsn       |
| MED31     | NELF-A   | Pur-alpha | RpL7    | sug         | trx        |
| MED4      | NELF-B   | put       | sa      | svp         | ttk        |
| MED6      | Nelf-E   | pygo      | Sap30   | Taf1        | Tudor-SN   |
| MED7      | Nf-YA    | pzg       | Scamp   | Taf10       | Ubi-p63E   |
| MED8      | Nf-YB    | r         | Sce     | Taf11       | Unr        |
| Meics     | Nf-YC    | Rab-RP4   | Scm     | Taf12       | Usf        |
| melt      | Nipped-A | Rab1      | Set2    | Taf13       | usp        |
| MEP-1     | Nipped-B | Rab10     | Sfmbt   | Taf2        | Utx        |
| Mes-4     | nos      | Rab11     | sgg     | Taf4        | wash       |
| Mes4      | Not1     | Rab2      | sim     | Taf5        | wts        |
| MESR4     | Nufip    | Rab26     | sima    | Taf6        | Xbp1       |
| Met       | opa      | Rab27     | simj    | Taf8        | XNP        |
| Mi-2      | Orc1     | Rab35     | Sin3A   | tai         | Xpd        |
| mib1      | Orc2     | Rab8      | Sir2    | tara        | yki        |
| Mio       | Orc5     | Rbf       | Sirt2   | Tbp         | YL-1       |
| mip120    | osa      | Rel       | Sirt4   | tefu        | yps        |
| mip130    | ovo      | rept      | Sirt6   | TFAM        | zfh1       |
| mip40     | p53      | Rfx       | Sirt7   | Tfb1        | zfh2       |
| Mitf      | pad      | Rga       | skd     | Tfb4        | Zpr1       |
| Mlh1      | Parg     | rhea      | Smox    | TfIIA-L     |            |
| mod(mdg4) | Parp     | rig       | Smr     | TfIIB       |            |
| mor       | Pbp49    | rl        | sno     | TfIIEalpha  |            |
| MRG15     | Pbp95    | rn        | Snr1    | TfIIEbeta   |            |
| mrn       | Pc       | rno       | Sp1     | TfIIFalpha  |            |
| mRpL28    | Pcf11    | row       | spel1   | TfIIFbeta   |            |
| mRpL55    | Pcl      | RpA-70    | spen    | TfIIS       |            |
| Msh6      | peb      | Rpb10     | spn-A   | TH1         |            |
| msl-3     | pfk      | Rpb11     | spn-E   | Thd1        |            |
| MTA1-like | ph-d     | Rpb4      | Spt3    | Tif-IA      |            |
| MTF-1     | ph-p     | Rpb5      | spt4    | tim         |            |
| mtg       | pho      | Rpb7      | Spt5    | tkv         |            |
