# Supplementary material for: Developmental Gene Discovery in a Hemimetabolous Insect: De Novo Assembly and Annotation of a Transcriptome for the Cricket Gryllus bimaculatus
Source: PubMed Central journal article supplement (PMC3646015; doi:10.1371/journal.pone.0061479), 2013-05-06
Supplement: pone.0061479.s007.pdf [file pone.0061479.s007.pdf]

Table S4

Selected signaling pathway genes identified in the *de novo* *G. bimaculatus* transcriptome.

| Process                    | # Hits | Hit ID (I/S) | Length (range) | Query Gene         | Transcriptome Sequence Name(s)                        |
|----------------------------|--------|--------------|----------------|--------------------|-------------------------------------------------------|
| <b>HEDGEHOG</b>            |        |              |                |                    |                                                       |
| <i>CK1</i>                 | 1      | A            | 3248           | <i>Ck1 alpha</i>   | isotig08262                                           |
|                            | 2      | A            | 3402-3498      | <i>dco</i>         | isotig01394, isotig01393                              |
|                            | 1      | A            | 2691           | <i>gish</i>        | isotig08729                                           |
| <i>Cos2</i>                | 1      | A            | 4125           | <i>cos</i>         | isotig07930                                           |
| <i>Fused</i>               | 1      | A            | 1624           | <i>fu</i>          | isotig10451                                           |
| <i>TGFb</i>                | 1      | A            | 1625           | <i>gbb</i>         | isotig07565                                           |
| <i>GSK-3β</i>              | 2      | A, S         | 367-483        | <i>sgg</i>         | GFJY65E0211Z50, isotig18361                           |
| <i>Megalin</i>             | 1      | A            | 2667           | <i>Cg42611</i>     | isotig08756                                           |
| <i>Patched</i>             | 2      | S            | 328-411        | <i>ptc</i>         | GFJY65E0211VDN, GFJY65E01ALZ8M                        |
| <i>PKA</i>                 | 1      | A            | 4812           | <i>Pka-C1</i>      | isotig07789                                           |
| <i>Smoothened</i>          | 2      | A            | 705            | <i>smo</i>         | isotig13374, isotig15392                              |
| <i>Suppressor of fused</i> | 1      | A            | 2625           | <i>Su(fu)</i>      | isotig08905                                           |
| <i>Slim b</i>              | 1      | A            | 4768           | <i>slmb</i>        | isotig04954                                           |
| <b>JAK/STAT</b>            |        |              |                |                    |                                                       |
| <i>AKT</i>                 | 1      | A            | 2629           | <i>Akt1</i>        | isotig08797                                           |
| <i>Cb1</i>                 | 1      | A            | 486            | <i>Cb1</i>         | isotig18303                                           |
| <i>CBP</i>                 | 4      | A, S         | 200-1501       | <i>nej</i>         | isotig17362, isotig05855, GE8SX9M02I88X1, isotig13864 |
| <i>PIAS</i>                | 2      | A            | 4065-4260      | <i>Su(var)2-10</i> | isotig04583, isotig04582                              |
| <i>GRB</i>                 | 1      | A            | 2371           | <i>drk</i>         | isotig00085                                           |
| <i>JAK</i>                 | 1      | A            | 2719           | <i>hop</i>         | isotig04276                                           |

|                   |   |      |           |                |                                                                          |
|-------------------|---|------|-----------|----------------|--------------------------------------------------------------------------|
| <i>PI3K</i>       | 1 | A    | 5218      | <i>Pi3K21B</i> | isotig07744                                                              |
|                   | 1 | A    | 1976      | <i>Pi3K92E</i> | isotig08270                                                              |
| <i>SHP2</i>       | 1 | S    | 266       | <i>csw</i>     | GE8SX9M02G96K3                                                           |
| <i>SOCS</i>       | 1 | A    | 2289      | <i>Socs16D</i> | isotig09205                                                              |
|                   | 1 | A    | 3530      | <i>Socs44A</i> | isotig08127                                                              |
|                   | 2 | A    | 2127-2190 | <i>Socs36E</i> | isotig05318, isotig05317                                                 |
| <i>SOS</i>        | 5 | A, S | 170-1931  | <i>Sos</i>     | isotig09775, GFJY65E01CUEPZ, GFCP6CO02F9P6M, GAP9EXG04D7UG1, isotig14668 |
| <i>Spred</i>      | 2 | A    | 1189-3475 | <i>Spred</i>   | isotig05180, isotig05181                                                 |
| <i>STAM</i>       | 2 | S    | 315-520   | <i>Stam</i>    | GFJY65E02GH370, GE8SX9M02IFMFR                                           |
| <i>STAT</i>       | 1 | A    | 2243      | <i>Stat92E</i> | isotig03185                                                              |
| <b>NOTCH</b>      |   |      |           |                |                                                                          |
| <i>APH-1</i>      | 1 | A    | 4738      | <i>aph-1</i>   | isotig04141                                                              |
| <i>CIR</i>        | 1 | A    | 1088      | <i>CG6843</i>  | contig11433                                                              |
| <i>CtBP</i>       | 3 | A, S | 239-624   | <i>CtBP</i>    | isotig16142, GE8SX9M01EF4BJ, FQTBZRY01BYCPR                              |
| <i>Deltex</i>     | 2 | A    | 1825-2309 | <i>dx</i>      | isotig09973, isotig09188                                                 |
| <i>disheveled</i> | 2 | A    | 2448-5763 | <i>dsh</i>     | isotig07449, isotig07448                                                 |
| <i>Groucho</i>    | 3 | A, S | 211-515   | <i>gro</i>     | isotig17698, GFJY65E01DLKWU, GFJY65E02GG7B9                              |
| <i>HATs</i>       | 4 | A, S | 200-1501  | <i>nej</i>     | isotig17362, isotig05855, GE8SX9M02I88X1, isotig13864                    |
| <i>HDAC</i>       | 1 | A    | 2212      | <i>Rpd3</i>    | isotig09325                                                              |
| <i>Nicastrin</i>  | 4 | A    | 766-2581  | <i>nct</i>     | isotig03085, isotig03084, isotig05814, isotig05814                       |
| <i>Notch</i>      | 4 | A, S | 423-2816  | <i>Notch</i>   | isotig14599, GE8SX9M01BNVPA, isotig12243, isotig08601                    |
| <i>Presenilin</i> | 2 | A    | 1999-3017 | <i>Psn</i>     | isotig03035, isotig03036                                                 |
| <i>PSE2</i>       | 1 | A    | 864       | <i>pen-2</i>   | isotig13452                                                              |
| <i>SKIP</i>       | 3 | A, S | 338-2107  | <i>Bx42</i>    | isotig05493, isotig05494, GFJY65E02IALF1                                 |
| <i>Tace</i>       | 1 | A    | 3117      | <i>Tace</i>    | isotig08377                                                              |
| <b>WNT</b>        |   |      |           |                |                                                                          |
| <i>APC</i>        | 4 | S    | 208-470   | <i>Apc</i>     | GFCP6CO02IKY6E, GFCP6CO01CGKAB, GFJY65E01EDMSG, GFJY65E01D5QKT           |
| <i>Axin</i>       | 2 | A    | 1769-2651 | <i>Axn</i>     | isotig00276, isotig08771                                                 |

|                                |   |      |           |                  |                                                       |
|--------------------------------|---|------|-----------|------------------|-------------------------------------------------------|
| <i>beta-catenin</i>            | 1 | A    | 3974      | <i>arm</i>       | isotig05341                                           |
| <i>beta-TrCP</i>               | 1 | A    | 4768      | <i>slmb</i>      | isotig04954                                           |
| <i>CaMKII</i>                  | 2 | A    | 1262-2572 | <i>CaMKII</i>    | isotig05571, isotig05572                              |
| <i>CaN</i>                     | 1 | A    | 3292      | <i>CanB2</i>     | isotig05734                                           |
| <i>CBP</i>                     | 4 | A, S | 200-1501  | <i>nej</i>       | isotig17362, isotig05855, GE8SX9M02I88X1, isotig13864 |
| <i>CK1</i>                     | 1 | A    | 3248      | <i>Ck1 alpha</i> | isotig08262                                           |
|                                | 2 | A    | 3402-3498 | <i>dco</i>       | isotig01394, isotig01393                              |
|                                | 1 | A    | 2691      | <i>gish</i>      | isotig08729                                           |
| <i>CK2</i>                     | 2 | A    | 3799-4012 | <i>Ckl1 beta</i> | isotig02546, isotig02545                              |
| <i>CtBP</i>                    | 3 | A, S | 239-624   | <i>CtBP</i>      | isotig16142, GE8SX9M01EF4BJ, FQTBZRY01BYCPR           |
| <i>Cul1</i>                    | 4 | A    | 3731-5498 | <i>lin19</i>     | isotig02458, isotig02457, isotig03607, isotig03606    |
| <i>Daam1</i>                   | 1 | S    | 223       | <i>DAAM</i>      | FQTBZRY02HV44R                                        |
| <i>disheveled</i>              | 2 | A    | 2448-5763 | <i>dsh</i>       | isotig07449, isotig07448                              |
| <i>Ebi1</i>                    | 1 | A    | 2312      | <i>ebi</i>       | isotig09177                                           |
| <i>GSK-3<math>\beta</math></i> | 2 | A, S | 367-483   | <i>sgg</i>       | GFJY65E0211Z50, isotig18361                           |
| <i>Groucho</i>                 | 3 | A, S | 211-515   | <i>gro</i>       | isotig17698, GFJY65E01DLKWU, GFJY65E02GG7B9           |
| <i>JNK</i>                     | 1 | S    | 230       | <i>bsk</i>       | GFJY65E01CRM61                                        |
| <i>LRP5/6</i>                  | 2 | S    | 259-493   | <i>arr</i>       | GFPC6CO01EVQLD, FQTBZRY02HHNYA                        |
| <i>NLK</i>                     | 1 | A    | 3303      | <i>nmo</i>       | isotig04244                                           |
| <i>PKA</i>                     | 1 | A    | 4812      | <i>Pka-C1</i>    | isotig07789                                           |
| <i>PKC</i>                     | 1 | A    | 4789      | <i>Pkc53E</i>    | isotig07795                                           |
| <i>PLC</i>                     | 1 | S    | 329       | <i>norpA</i>     | GFJY65E01AO8M1                                        |
| <i>PP2A</i>                    | 3 | A    | 1910-5172 | <i>Pp2A-29B</i>  | isotig02130, isotig02129, isotig09820                 |
|                                | 1 | A    | 1734      | <i>mts</i>       | isotig00164                                           |
| <i>Proc</i>                    | 1 | A    | 1974      | <i>por</i>       | isotig09691                                           |
| <i>Protein52</i>               | 1 | A    | 1461      | <i>pont</i>      | contig15673                                           |
| <i>PS-1</i>                    | 2 | A    | 1999-3017 | <i>Psn</i>       | isotig03035, isotig03036                              |
| <i>Rac</i>                     | 1 | A    | 2954      | <i>Rac1</i>      | isotig08497                                           |
| <i>Rbx1</i>                    | 2 | S    | 459-480   | <i>Roc1a</i>     | GFPC6CO02GX3GB, GFPC6CO02I0JF4                        |
| <i>RhoA</i>                    | 2 | A    | 2482-3812 | <i>Rho1</i>      | isotig00258, isotig03933                              |
| <i>rhomboid-7</i>              | 1 | A    | 3315      | <i>rho-7</i>     | isotig05079                                           |

|                  |   |      |           |                 |                                                                                                        |
|------------------|---|------|-----------|-----------------|--------------------------------------------------------------------------------------------------------|
| <i>ROCK2</i>     | 8 | A    | 853-4515  | <i>rok</i>      | isotig01612, isotig01613, isotig01614, isotig01615, isotig01616, isotig01617, isotig06106, isotig06107 |
| <i>Siah-1</i>    | 2 | A    | 1698-2386 | <i>sina</i>     | isotig09073, isotig10251                                                                               |
|                  | 8 | A    | 3812-4068 | <i>sinah</i>    | isotig00589, isotig00588, isotig00587, isotig00586, isotig00585, isotig00584, isotig00583, isotig00582 |
| <i>SIP</i>       | 1 | A    | 587       | <i>CG3226</i>   | contig15490                                                                                            |
| <i>Skp1</i>      | 1 | A    | 951       | <i>skpF</i>     | isotig12819                                                                                            |
| <i>SMAD3</i>     | 1 | S    | 332       | <i>Smox</i>     | GFCP6CO01DS40Z                                                                                         |
| <i>SMAD4</i>     | 1 | A    | 729       | <i>Med</i>      | isotig15042                                                                                            |
| <i>Stbm</i>      | 1 | A    | 2916      | <i>Vang</i>     | isotig08532                                                                                            |
| <i>Wif-1</i>     | 2 | A    | 1568-1581 | <i>shf</i>      | isotig02624, isotig02623                                                                               |
| <b>TGF-BETA</b>  |   |      |           |                 |                                                                                                        |
| <i>ActivinRl</i> | 1 | A    | 2267      | <i>babo</i>     | isotig09236                                                                                            |
| <i>Cul1</i>      | 4 | A    | 3731-5498 | <i>lin19</i>    | isotig02458, isotig02457, isotig03607, isotig03606                                                     |
| <i>DP1</i>       | 1 | A    | 3452      | <i>tfdp1a</i>   | isotig08163                                                                                            |
| <i>E2F4/5</i>    | 4 | A    | 1708-1929 | <i>e2f4</i>     | isotig00805, isotig00806, isotig00807, isotig00808                                                     |
| <i>ERK</i>       | 1 | A    | 799       | <i>rl</i>       | isotig14164                                                                                            |
| <i>Id</i>        | 1 | S    | 201       | <i>emc</i>      | FQTBZRY02G5SHM                                                                                         |
| <i>TGFb</i>      | 1 | A    | 1625      | <i>gbb</i>      | isotig07565                                                                                            |
| <i>p107</i>      | 2 | A    | 6434-6542 | <i>Rbf</i>      | isotig04489, isotig04488                                                                               |
| <i>p300</i>      | 4 | A, S | 200-1501  | <i>nej</i>      | isotig17362, isotig05855, GE8SX9M02I88X1, isotig13864                                                  |
| <i>p70S6K</i>    | 1 | A    | 3234      | <i>S6K</i>      | isotig08277                                                                                            |
| <i>PP2A</i>      | 3 | A    | 1910-5172 | <i>Pp2A-29B</i> | isotig02130, isotig02129, isotig09820                                                                  |
|                  | 1 | A    | 1734      | <i>mts</i>      | isotig00164                                                                                            |
| <i>Rbx1</i>      | 2 | S    | 459-480   | <i>Roc1a</i>    | GFCP6CO02GX3GB, GFCP6CO02I0JF4                                                                         |
| <i>RhoA</i>      | 2 | A    | 2482-3812 | <i>Rho1</i>     | isotig00258, isotig03933                                                                               |
| <i>ROCK1</i>     | 8 | A    | 853-4515  | <i>rok</i>      | isotig01612, isotig01613, isotig01614, isotig01615, isotig01616, isotig01617, isotig06106, isotig06107 |
| <i>SARA</i>      | 1 | A    | 2592      | <i>Sara</i>     | isotig08835                                                                                            |
| <i>Skp1</i>      | 1 | A    | 951       | <i>skpF</i>     | isotig12819                                                                                            |
| <i>Smad1/5/8</i> | 1 | A    | 2120      | <i>Mad</i>      | isotig09444                                                                                            |
| <i>Smad2/3</i>   | 1 | S    | 332       | <i>Smox</i>     | GFCP6CO01DS40Z                                                                                         |

|                                |   |      |           |               |                                                                                |
|--------------------------------|---|------|-----------|---------------|--------------------------------------------------------------------------------|
| <i>Smad4</i>                   | 1 | A    | 729       | <i>Med</i>    | isotig15042                                                                    |
| <i>Smurf1/2</i>                | 1 | A    | 4308      | <i>lack</i>   | isotig07879                                                                    |
| <b>MAPK</b>                    |   |      |           |               |                                                                                |
| <i>Boss</i>                    | 1 | A    | 3134      | <i>boss</i>   | isotig08354                                                                    |
| <i>Csw</i>                     | 1 | S    | 266       | <i>csw</i>    | GE8SX9M02G96K3                                                                 |
| <i>Drk</i>                     | 1 | A    | 2371      | <i>drk</i>    | isotig00085                                                                    |
| <i>Dsor1</i>                   | 1 | A    | 3545      | <i>Dsor1</i>  | isotig08121                                                                    |
| <i>Egfr</i>                    | 1 | A    | 1099      | <i>Egfr</i>   | isotig12088                                                                    |
| <i>Gap1</i>                    | 2 | S    | 280-358   | <i>Gap1</i>   | GE8SX9M02HTUD8, GFJY65E01B2IBY                                                 |
| <i>Phl</i>                     | 1 | A    | 4282      | <i>phl</i>    | isotig07892                                                                    |
| <i>Pointed</i>                 | 1 | S    | 314       | <i>pnt</i>    | GFCP6CO01CJJKD                                                                 |
| <i>Ras85D</i>                  | 2 | A    | 2078-2467 | <i>Ras85D</i> | isotig09494, isotig08979                                                       |
| <i>Rolled</i>                  | 1 | A    | 799       | <i>rl</i>     | isotig14164                                                                    |
| <i>Sos</i>                     | 5 | A, S | 170-1931  | <i>Sos</i>    | isotig09775, GFJY65E01CUEPZ, GFCP6CO02F9P6M, GAP9EXG04D7UG1, isotig14668       |
| <i>Ts1</i>                     | 1 | S    | 174       | <i>ts1</i>    | GFCP6CO02G92YK                                                                 |
| <i>Yan</i>                     | 1 | A    | 4007      | <i>aop</i>    | isotig07960                                                                    |
| <b>HIPPO</b>                   |   |      |           |               |                                                                                |
| <i>cyclinE</i>                 | 6 | A    | 1521-3799 | <i>CycE</i>   | isotig01638, isotig01637, isotig01636, isotig01641, isotig01640, isotig01639   |
| <i>Dco</i>                     | 2 | A    | 3402-3498 | <i>dco</i>    | isotig01394, isotig01393                                                       |
| <i>diap1</i>                   | 2 | A    | 1796-2785 | <i>th</i>     | isotig03633, isotig03632                                                       |
| <i>Expanded</i>                | 2 | S    | 306-466   | <i>ex</i>     | GFJY65E01B9CAF, GFJY65E01DAZCK                                                 |
| <i>Fat</i>                     | 1 | A    | 716       | <i>ft</i>     | isotig15250                                                                    |
| <i>Hippo</i>                   | 3 | A    | 953-1763  | <i>hpo</i>    | isotig03127, isotig03128, isotig03129                                          |
| <i>homothorax</i>              | 5 | S    | 153-234   | <i>hth</i>    | FQTBZRY01D5WGD, FQTBZRY01AYECO, FQTBZRY02GY7HW, FQTBZRY02JLK81, FQTBZRY02FHQV8 |
| <i>Kibra</i>                   | 4 | A    | 365-974   | <i>kibra</i>  | isotig12669, isotig19618, isotig19193, isotig13198                             |
| <i>Merlin</i>                  | 1 | A    | 1313      | <i>Mer</i>    | isotig11307                                                                    |
| <i>Mob as tumor suppressor</i> | 1 | A    | 1862      | <i>mats</i>   | isotig09892                                                                    |
| <i>Salvador</i>                | 1 | S    | 479       | <i>sav</i>    | GFJY65E01DC652                                                                 |

|               |   |   |     |            |                |
|---------------|---|---|-----|------------|----------------|
| <i>Warts</i>  | 1 | S | 300 | <i>wts</i> | GFJY65E01AT7SH |
| <i>yorkie</i> | 1 | S | 507 | <i>yki</i> | GFCP6CO02JM8ZY |

---
