# Supplementary material for: Developmental Gene Discovery in a Hemimetabolous Insect: De Novo Assembly and Annotation of a Transcriptome for the Cricket Gryllus bimaculatus
Source: PubMed Central journal article supplement (PMC3646015; doi:10.1371/journal.pone.0061479), 2013-05-06
Supplement: pone.0061479.s008.pdf [file pone.0061479.s008.pdf]

Table S5

Selected gametogenesis genes identified in the *de novo* *G. bimaculatus* transcriptome

| Process                                                          | # Hits | Hit ID (A/S) | Length (range) | Query Gene      | Transcriptome Sequence Names                                                              |
|------------------------------------------------------------------|--------|--------------|----------------|-----------------|-------------------------------------------------------------------------------------------|
| <b>SPERMATOGENESIS<sup>1</sup></b>                               |        |              |                |                 |                                                                                           |
| <b>TRANSCRIPTION FACTORS</b>                                     |        |              |                |                 |                                                                                           |
| <i>Enhancer of bithorax</i>                                      | 1      | A            | 4242           | <i>E(bx)</i>    | contig15318                                                                               |
| <i>eyes absent</i>                                               | 1      | S            | 401            | <i>eya</i>      | GFJY65E01EO7KL                                                                            |
| <i>Heat shock factor</i>                                         | 4      | A            | 3119-3268      | <i>Hsf</i>      | isotig01705, isotig01704, isotig01703, isotig01702                                        |
| <i>maleless</i>                                                  | 1      | A            | 3818           | <i>mle</i>      | isotig05146                                                                               |
| <i>MBD-like</i>                                                  | 7      | A            | 694-1211       | <i>MBD-like</i> | isotig01061, isotig01060, isotig01064, isotig01063, isotig01062, isotig01066, isotig01065 |
| <i>Myb oncogene-like</i>                                         | 1      | A            | 3771           | <i>Myb</i>      | isotig08042                                                                               |
| <i>Rfx</i>                                                       | 1      | A            | 1001           | <i>Rfx</i>      | isotig12547                                                                               |
| <i>TATA box binding protein-related factor 2</i>                 | 3      | A, S         | 399-3469       | <i>Trf2</i>     | GFPC6CO01B8937, isotig01886, isotig01885                                                  |
| <b>CYTOSKELETON</b>                                              |        |              |                |                 |                                                                                           |
| <i>Adenomatous popylosis coli tumor suppressor homolog (APC)</i> | 4      | S            | 208-470        | <i>Apc</i>      | GFPC6CO02IKY6E, GFPC6CO01CGKAB, GFJY65E01EDMSG, GFJY65E01D5QKT                            |
| <i>Adenomatous popylosis coli tumor suppressor homolog 2</i>     | 2      | S            | 315-470        | <i>Apc2</i>     | GFPC6CO02IKY6E, GFJY65E01D5QKT                                                            |
| <i>beta tubulin</i>                                              | 2      | A            | 546-950        | <i>Btub56D</i>  | contig00262, contig00455                                                                  |

<sup>1</sup> Although we did not include cDNA derived from adult testes in our sequencing libraries, we nonetheless chose to perform manual annotation of genes known to be involved in *D. melanogaster* spermatogenesis since the creation of the testis germ line stem cell niche takes place during embryogenesis in *D. melanogaster* (Aboïm AN (1945) Développement embryonnaire et post-embryonnaire des gonades normales et agamétiques de *Drosophila melanogaster*. Revue Suisse de Zoologie 3: 53-154; Le Bras S, Van Doren M (2006) Development of the male germline stem cell niche in *Drosophila*. Developmental Biology 294: 92-103.) and in orthopterans 3. Nelsen OE (1931) Life cycle, sex differentiation, and testis development in *Melanoplus differentialis* (Acrididae, Orthoptera). Journal of Morphology 51: 467-525.)

|                                           |   |   |           |                                 |                                                    |
|-------------------------------------------|---|---|-----------|---------------------------------|----------------------------------------------------|
| <i>cortactin</i>                          | 1 | A | 1147      | <i>Cortactin</i>                | isotig11852                                        |
| <i>diaphanous</i>                         | 1 | S | 237       | <i>dia</i>                      | FQTBZRY01CIL7E                                     |
| <i>jaguar</i>                             | 3 | A | 958-2609  | <i>jar</i>                      | isotig12791, isotig12012, isotig08822              |
| <i>Kinesin like protein at 61F</i>        | 3 | A | 2102-3639 | <i>Klp61F</i>                   | isotig01563, isotig01564, isotig01565              |
| <i>Myosin 31DF</i>                        | 2 | A | 1018-1306 | <i>Myo31DF</i>                  | isotig11312, isotig12459                           |
| <i>peanut</i>                             | 1 | A | 1957      | <i>pnut</i>                     | isotig09723                                        |
| <i>Rac1</i>                               | 1 | A | 2954      | <i>Rac1</i>                     | isotig08497                                        |
| <i>Spectrin 1</i>                         | 4 | A | 409-2155  | <i><math>\alpha</math>-Spec</i> | isotig09397, isotig10052, isotig15468, isotig19330 |
| <i>spindle assembly abnormal 6</i>        | 1 | A | 2655      | <i>sas-6</i>                    | isotig05533                                        |
| <i>subito</i>                             | 1 | A | 2615      | <i>sub</i>                      | contig14686                                        |
| <i>twinstar</i>                           | 2 | A | 513-2077  | <i>tsr</i>                      | isotig00493, isotig00494                           |
| <i>zipper</i>                             | 2 | A | 3077-3958 | <i>zip</i>                      | isotig05158, isotig08407                           |
| <b>OTHER PROCESSES IN SPERMATOGENESIS</b> |   |   |           |                                 |                                                    |
| <i>armitage</i>                           | 1 | A | 4095      | <i>armi</i>                     | isotig07934                                        |
| <i>asterless</i>                          | 1 | A | 3788      | <i>asl</i>                      | isotig08040                                        |
| <i>aubergine</i>                          | 2 | A | 2674-2784 | <i>aub</i>                      | isotig07461, isotig07462                           |
| <i>boule</i>                              | 1 | S | 203       | <i>bol</i>                      | GFJY65E01B4FFK                                     |
| <i>bride of sevenless</i>                 | 1 | A | 3134      | <i>boss</i>                     | isotig08354                                        |
| <i>Btk family kinase at 29A</i>           | 2 | A | 915-1545  | <i>Btk29A</i>                   | isotig06869, isotig10647                           |
| <i>Bub1-related kinase</i>                | 1 | A | 4209      | <i>BubR1</i>                    | isotig07912                                        |
| <i>Calmodulin</i>                         | 3 | A | 1591-1698 | <i>Cam</i>                      | isotig00266, isotig00265, isotig00264              |
| <i>capsuleen</i>                          | 2 | A | 3725-3816 | <i>csul</i>                     | isotig01229, isotig01228                           |
| <i>cdc2</i>                               | 1 | A | 2078      | <i>cdc2</i>                     | isotig03292                                        |
| <i>courtless</i>                          | 1 | A | 1123      | <i>crl</i>                      | isotig11993                                        |
| <i>Cyclin A</i>                           | 1 | A | 3049      | <i>CycA</i>                     | isotig03226                                        |
| <i>Cytochrome c proximal</i>              | 1 | A | 636       | <i>Cyt-c-p</i>                  | contig10573                                        |
| <i>Cytochrome c distal</i>                | 1 | A | 778       | <i>Cyt-c-d</i>                  | isotig14404                                        |
| <i>Dynamin related protein 1</i>          | 4 | A | 908-3502  | <i>Drp1</i>                     | isotig13131, isotig01328, isotig01327, isotig01326 |
| <i>effete</i>                             | 2 | A | 3342-4080 | <i>eff</i>                      | isotig01782, isotig01780                           |
| <i>Fmr1</i>                               | 2 | A | 1038-1053 | <i>Fmr1</i>                     | isotig06512, isotig06513                           |
| <i>Fps oncogene analog</i>                | 1 | A | 328       | <i>Fps85D</i>                   | isotig19747                                        |
| <i>glass bottom boat</i>                  | 1 | A | 1625      | <i>gbb</i>                      | isotig07565                                        |

|                                                         |   |   |           |               |                                       |
|---------------------------------------------------------|---|---|-----------|---------------|---------------------------------------|
| <i>gilgamesh</i>                                        | 1 | A | 2691      | <i>gish</i>   | isotig08729                           |
| <i>hephaestus</i>                                       | 2 | S | 201-359   | <i>heph</i>   | GE8SX9M01A0TGF, <b>FQTBZRY02F9D2F</b> |
| <i>Ice</i>                                              | 2 | A | 1620-1800 | <i>Ice</i>    | isotig04366, isotig10455              |
| <i>karyopherin α1</i>                                   | 1 | A | 1309      | <i>Kap-α1</i> | isotig11303                           |
| <i>loquacious</i>                                       | 1 | A | 2867      | <i>loqs</i>   | isotig02873                           |
| <i>Microcephalin</i>                                    | 2 | A | 3384-4822 | <i>MCPH1</i>  | isotig04588, isotig04589              |
| <i>Myt1</i>                                             | 1 | A | 3433      | <i>Myt1</i>   | isotig04225                           |
| <i>Nedd2-like caspase</i>                               | 1 | A | 2900      | <i>Nc</i>     | isotig03487                           |
| <i>parkin</i>                                           | 2 | A | 3339-3502 | <i>park</i>   | isotig04723, isotig04722              |
| <i>pavarotti</i>                                        | 2 | A | 2221-2661 | <i>pav</i>    | isotig03050, isotig03049              |
| <i>pelota</i>                                           | 1 | A | 922       | <i>pelo</i>   | contig17247                           |
| <i>piwi</i>                                             | 1 | A | 1277      | <i>piwi</i>   | isotig11428                           |
| <i>pole hole</i>                                        | 1 | A | 4282      | <i>phl</i>    | isotig07892                           |
| <i>punt</i>                                             | 1 | S | 441       | <i>put</i>    | GE8SX9M01B9MGK                        |
| <i>Rab-protein 11</i>                                   | 1 | A | 2448      | <i>Rab11</i>  | isotig00835                           |
| <i>Rheb</i>                                             | 1 | A | 953       | <i>Rheb</i>   | contig21414                           |
| <i>shotgun</i>                                          | 1 | A | 4583      | <i>shg</i>    | isotig04828                           |
| <i>shut down</i>                                        | 2 | A | 2449-3029 | <i>shu</i>    | isotig04931, isotig04930              |
| <i>string</i>                                           | 1 | A | 911       | <i>stg</i>    | isotig13103                           |
| <i>Syntaxin 5</i>                                       | 3 | A | 2683-3493 | <i>Syx5</i>   | isotig01824, isotig01823, isotig01825 |
| <i>transformer 2</i>                                    | 1 | A | 836       | <i>tra2</i>   | contig12123                           |
| <i>terribly reduced optic lobes</i>                     | 1 | A | 690       | <i>trol</i>   | isotig15574                           |
| <i>uncoordinated</i>                                    | 1 | A | 2116      | <i>unc</i>    | isotig09457                           |
| <i>vav</i>                                              | 1 | A | 2068      | <i>vav</i>    | isotig09529                           |
| <i>ypsilon schachtel</i>                                | 1 | A | 2601      | <i>yps</i>    | isotig03079                           |
| <b>OOGENESIS</b>                                        |   |   |           |               |                                       |
| <b>MAINTENANCE AND DIVISION OF GERM LINE STEM CELLS</b> |   |   |           |               |                                       |
| <i>armadillo</i>                                        | 1 | A | 3974      | <i>arm</i>    | isotig05341                           |
| <i>Axin</i>                                             | 2 | A | 1769-2651 | <i>Axn</i>    | isotig00276, isotig08771              |
| <i>Dicer-1</i>                                          | 1 | A | 2177      | <i>Dcr-1</i>  | isotig09376                           |
| <i>dishevelled</i>                                      | 2 | A | 2448-5763 | <i>dsh</i>    | isotig07449, isotig07448              |
| <i>effete</i>                                           | 2 | A | 3342-4080 | <i>eff</i>    | isotig01782, isotig01780              |

Table S5 Page 3 of 10



|                                                      |   |      |           |               |                                                                              |
|------------------------------------------------------|---|------|-----------|---------------|------------------------------------------------------------------------------|
| <i>Helicase at 25E</i>                               | 2 | S    | 277-341   | <i>Hel25E</i> | GFJY65E01EGNY3, GE8SX9M01BJ16P                                               |
| <i>hu-li tai shao</i>                                | 6 | A    | 2255-2885 | <i>hts</i>    | isotig01647, isotig01646, isotig01645, isotig01644, isotig01643, isotig01642 |
| <i>Kinesin heavy chain</i>                           | 2 | A    | 3918-7009 | <i>Khc</i>    | isotig04492, isotig04493                                                     |
| <i>licorne</i>                                       | 1 | A    | 2845      | <i>lic</i>    | contig18303                                                                  |
| <i>lkb1</i>                                          | 2 | A    | 3048-3216 | <i>lkb1</i>   | isotig01200, isotig01199                                                     |
| <i>maelstrom</i>                                     | 1 | A    | 2668      | <i>mael</i>   | isotig06013                                                                  |
| <i>okra</i>                                          | 1 | A    | 1794      | <i>okr</i>    | isotig10034                                                                  |
| <i>par-1</i>                                         | 1 | A    | 889       | <i>par-1</i>  | isotig07610                                                                  |
| <i>par-6</i>                                         | 1 | A    | 3994      | <i>par-6</i>  | isotig07961                                                                  |
| <i>pipsqueak</i>                                     | 1 | A    | 1991      | <i>Rab-6</i>  | isotig09661                                                                  |
| <i>tudor</i>                                         | 1 | A    | 3025      | <i>spn-E</i>  | contig00220                                                                  |
| <b>FORMATION OF DV AXIS</b>                          |   |      |           |               |                                                                              |
| <i>cappuccino</i>                                    | 2 | A    | 817-866   | <i>capu</i>   | isotig06798, isotig06799                                                     |
| <i>orb</i>                                           | 1 | A    | 4765      | <i>orb</i>    | isotig00462                                                                  |
| <i>pipe</i>                                          | 1 | A    | 6608      | <i>pip</i>    | isotig07697                                                                  |
| <i>squid</i>                                         | 1 | A    | 1546      | <i>sqd</i>    | isotig00544                                                                  |
| <i>trailer hitch</i>                                 | 2 | A    | 263-493   | <i>tral</i>   | isotig18126, isotig07398                                                     |
| <b>ACTING EARLY IN FOLLICLE CELLS (DORSAL GROUP)</b> |   |      |           |               |                                                                              |
| <i>big brain</i>                                     | 3 | S    | 298-515   | <i>bib</i>    | GE8SX9M01BXNN0, GFJY65E01CFBEX, GFCP6CO01EV5QZ                               |
| <i>bunched</i>                                       | 1 | A    | 869       | <i>bun</i>    | isotig13467                                                                  |
| <i>Chorion factor 2</i>                              | 1 | S    | 147       | <i>Cf2</i>    | GFCP6CO01DSOAR                                                               |
| <i>corkscrew</i>                                     | 1 | S    | 266       | <i>csw</i>    | GE8SX9M02G96K3                                                               |
| <i>dodo</i>                                          | 2 | A    | 1975-1994 | <i>dod</i>    | isotig05499, isotig05500                                                     |
| <i>broad</i>                                         | 1 | A    | 904       | <i>br</i>     | isotig13160                                                                  |
| <i>torpedo</i>                                       | 1 | A    | 1099      | <i>Egfr</i>   | isotig12088                                                                  |
| <i>Ets at 97D</i>                                    | 1 | A    | 2149      | <i>Ets97D</i> | isotig05797                                                                  |
| <i>kibra ortholog</i>                                | 1 | A    | 974       | <i>kibra</i>  | isotig12669                                                                  |
| <i>mago nashi</i>                                    | 1 | A    | 1021      | <i>mago</i>   | isotig12375                                                                  |
| <i>Notch</i>                                         | 4 | A, S | 423-2816  | <i>Notch</i>  | isotig14599, GE8SX9M01BNVPA, isotig12243, isotig08601                        |
| <i>pointed</i>                                       | 1 | S    | 314       | <i>pnt</i>    | GFCP6CO01CJJKD                                                               |
| <i>Rac1</i>                                          | 1 | A    | 2954      | <i>Rac1</i>   | isotig08497                                                                  |

|                                           |   |      |           |                  |                                                      |
|-------------------------------------------|---|------|-----------|------------------|------------------------------------------------------|
| <i>Ras oncogene at 85D</i>                | 2 | A    | 2078-2467 | <i>Ras85D</i>    | isotig09494, isotig08979                             |
| <i>rolled</i>                             | 1 | A    | 799       | <i>rl</i>        | isotig14164                                          |
| <i>singed</i>                             | 1 | S    | 239       | <i>sn</i>        | GE8SX9M01EZ3K3                                       |
| <b>TERMINAL GENES</b>                     |   |      |           |                  |                                                      |
| <i>SHC-adaptor protein</i>                | 2 | A    | 2374-2640 | <i>Shc</i>       | isotig05081, isotig05082                             |
| <i>torso-like</i>                         | 1 | S    | 174       | <i>ts1</i>       | GFCP6CO02G92YK                                       |
| <b>LIGANDS, RECEPTORS &amp; EFFECTORS</b> |   |      |           |                  |                                                      |
| <i>hopscotch</i>                          | 1 | A    | 2719      | <i>hop</i>       | isotig04276                                          |
| <i>Keren</i>                              | 1 | A    | 1803      | <i>Krn</i>       | isotig10026                                          |
| <i>kugelei</i>                            | 1 | A    | 729       | <i>kug</i>       | isotig15037                                          |
| <i>Medea</i>                              | 1 | A    | 729       | <i>Med</i>       | isotig15042                                          |
| <i>Mothers against dpp</i>                | 1 | A    | 2120      | <i>Mad</i>       | isotig09444                                          |
| <i>Protein tyrosine phosphatase 69D</i>   | 2 | A, S | 471-1475  | <i>Ptp69D</i>    | isotig10837, <b>GFCP6CO02HK6UL</b>                   |
| <i>punt</i>                               | 1 | S    | 441       | <i>put</i>       | GE8SX9M01B9MGK                                       |
| <i>saxophone</i>                          | 1 | A    | 4561      | <i>sax</i>       | isotig07822                                          |
| <i>shotgun</i>                            | 1 | A    | 4583      | <i>shg</i>       | isotig04828                                          |
| <i>Star</i>                               | 1 | A    | 4011      | <i>S</i>         | isotig07955                                          |
| <i>STAT</i>                               | 1 | A    | 2243      | <i>Stat92E</i>   | isotig03185                                          |
| <b>GENES AFFECTING CYTOSKELETON</b>       |   |      |           |                  |                                                      |
| <i>adnormal spindle</i>                   | 1 | A    | 6563      | <i>asp</i>       | isotig07699                                          |
| <i>alpha actinin</i>                      | 1 | A    | 2837      | <i>Actn</i>      | isotig08592                                          |
| <i>Btk family kinase at 29A</i>           | 2 | A    | 915-1545  | <i>Btk29A</i>    | isotig06869, <b>isotig10647</b>                      |
| <i>capulet</i>                            | 1 | A    | 3379      | <i>capt</i>      | isotig04236                                          |
| <i>Cdc42</i>                              | 1 | A    | 2958      | <i>Cdc42</i>     | isotig03915                                          |
| <i>Ced-12</i>                             | 1 | A    | 3012      | <i>Ced-12</i>    | isotig08450                                          |
| <i>chromosome bows</i>                    | 1 | A    | 1067      | <i>chb</i>       | isotig12228                                          |
| <i>sticky</i>                             | 1 | A    | 3121      | <i>sti</i>       | isotig08364                                          |
| <i>Cortactin</i>                          | 1 | A    | 1147      | <i>Cortactin</i> | isotig11852                                          |
| <i>diaphanous</i>                         | 2 | S    | 237-429   | <i>dia</i>       | FQTBZRY01CIL7E, <b>GFJY65E01CBNCA</b>                |
| <i>qenghis khan</i>                       | 1 | A    | 2408      | <i>gek</i>       | isotig09046                                          |
| <i>jaquar</i>                             | 3 | A    | 958-2609  | <i>jar</i>       | isotig12791, <b>isotig12012</b> , <b>isotig08822</b> |
| <i>kette</i>                              | 1 | A    | 5316      | <i>Hem</i>       | isotig07736                                          |
| <i>Kinesin associated protein 3</i>       | 1 | A    | 3027      | <i>Kap3</i>      | contig12721                                          |
| <i>klarsicht</i>                          | 1 | A    | 1805      | <i>klar</i>      | isotig10023                                          |

|                                           |   |      |           |                |                                                                                                                                                         |
|-------------------------------------------|---|------|-----------|----------------|---------------------------------------------------------------------------------------------------------------------------------------------------------|
| <i>Lamin</i>                              | 1 | A    | 1757      | <i>Lam</i>     | contig17155                                                                                                                                             |
| <i>Lissencephaly</i>                      | 1 | A    | 4309      | <i>Lis-1</i>   | isotig02186                                                                                                                                             |
| <i>mushrom body defect</i>                | 1 | A    | 2026      | <i>mud</i>     | contig12641                                                                                                                                             |
|                                           |   |      |           |                | GFJY65E01DWNJO,GFJY65E01DDZGX,<br>isotig00295, isotig00293, <b>GE8SX9M02JKH1C</b> ,<br><b>GE8SX9M01EGTZF</b> , GFCP6C001CRFSJ,<br><b>GE8SX9M02F0G9A</b> |
| <i>rho-type guanine exchange factor</i>   | 8 | A, S | 234-1847  | <i>rtGEF</i>   |                                                                                                                                                         |
| <i>short stop</i>                         | 3 | A    | 673-1571  | <i>shot</i>    | isotig13049, isotig10577, isotig15743                                                                                                                   |
| <i>spaghetti squash</i>                   | 3 | A    | 616-1053  | <i>sqh</i>     | contig15080, isotig00107, isotig00106                                                                                                                   |
| <i>Src oncogene at 42A</i>                | 1 | A    | 1787      | <i>Src42A</i>  | isotig04219                                                                                                                                             |
| <i>subito</i>                             | 1 | A    | 2615      | <i>sub</i>     | contig14686                                                                                                                                             |
| <i>Suppressor of proflin 2</i>            | 1 | A    | 1695      | <i>Sop2</i>    | isotig06657                                                                                                                                             |
| <i>twinstar</i>                           | 2 | A    | 513-2077  | <i>tsr</i>     | isotig00493, isotig00494                                                                                                                                |
| <i>washout</i>                            | 1 | A    | 608       | <i>wash</i>    | isotig07224                                                                                                                                             |
| <i>zipper</i>                             | 1 | A    | 3958      | <i>zip</i>     | isotig05158                                                                                                                                             |
| <b>OTHER GENES INVOLVED IN OOGENESIS</b>  |   |      |           |                |                                                                                                                                                         |
| <i>altered disjunction</i>                | 3 | A    | 3259-3423 | <i>ald</i>     | isotig03616, isotig03615, isotig03614                                                                                                                   |
| <i>archipelago</i>                        | 1 | A    | 4393      | <i>ago</i>     | isotig00333                                                                                                                                             |
| <i>chiffon</i>                            | 1 | A    | 3144      | <i>chif</i>    | isotig08349                                                                                                                                             |
| <i>Cyclin-dependent kinase 7</i>          | 1 | A    | 2272      | <i>Cdk7</i>    | isotig02269                                                                                                                                             |
| <i>Cyclin-dependent kinase subunit30A</i> | 1 | A    | 1011      | <i>Cks30A</i>  | isotig06131                                                                                                                                             |
| <i>Cyclin E</i>                           | 6 | A    | 1521-3799 | <i>CycE</i>    | isotig01638, isotig01637, isotig01636, isotig01641,<br>isotig01640, isotig01639                                                                         |
| <i>double parked</i>                      | 1 | A    | 5242      | <i>dup</i>     | isotig07741                                                                                                                                             |
| <i>E2F transcription factor</i>           | 1 | A    | 918       | <i>E2f</i>     | isotig13069                                                                                                                                             |
| <i>geminin</i>                            | 1 | A    | 921       | <i>geminin</i> | isotig04440                                                                                                                                             |
| <i>imaginal discs arrested</i>            | 1 | A    | 5406      | <i>ida</i>     | isotig07735                                                                                                                                             |
| <i>loki</i>                               | 1 | A    | 2488      | <i>lok</i>     | isotig05744                                                                                                                                             |
| <i>meiotic 41</i>                         | 1 | A    | 1228      | <i>mei-41</i>  | isotig11599                                                                                                                                             |
| <i>Microcephalin</i>                      | 2 | A    | 3384-4822 | <i>MCPH1</i>   | isotig04588, isotig04589                                                                                                                                |
| <i>morula</i>                             | 2 | A    | 1648-1877 | <i>mr</i>      | isotig09875, isotig10364                                                                                                                                |
| <i>mutagen-sensitive 209</i>              | 1 | A    | 1396      | <i>mus209</i>  | isotig00238                                                                                                                                             |
| <i>Myb oncogene-like</i>                  | 1 | A    | 3771      | <i>Myb</i>     | isotig08042                                                                                                                                             |
| <i>Myt1</i>                               | 1 | A    | 3433      | <i>Myt1</i>    | isotig04225                                                                                                                                             |
| <i>pitchoune</i>                          | 1 | A    | 3126      | <i>pit</i>     | isotig04252                                                                                                                                             |
| <i>sarah</i>                              | 1 | A    | 3505      | <i>sra</i>     | isotig08135                                                                                                                                             |
| <i>twins</i>                              | 2 | A    | 2511-3747 | <i>tw</i>      | isotig04782, isotig04783                                                                                                                                |
| <i>abstrakt</i>                           | 1 | A    | 1429      | <i>abs</i>     | isotig10965                                                                                                                                             |

|                                                                              |   |      |           |                                   |                                                                 |
|------------------------------------------------------------------------------|---|------|-----------|-----------------------------------|-----------------------------------------------------------------|
| <i>anterior open</i>                                                         | 1 | A    | 4007      | <i>aop</i>                        | isotig07960                                                     |
| <i>aubergine</i>                                                             | 2 | A    | 2674-2784 | <i>aub</i>                        | isotig07461, isotig07462                                        |
| <i>Autophagy-specific gene 1</i>                                             | 1 | A    | 1467      | <i>Atg1</i>                       | contig16688                                                     |
| <i>basket</i>                                                                | 1 | S    | 230       | <i>bsk</i>                        | GFJY65E01CRM61                                                  |
| <i>blistered</i>                                                             | 2 | S    | 233-241   | <i>bs</i>                         | GE8SX9M02GMAG7, GFJY65E02FKS1J                                  |
| <i>brainiac</i>                                                              | 1 | A    | 1870      | <i>brn</i>                        | isotig09883                                                     |
| <i>Bruce</i>                                                                 | 1 | A    | 4923      | <i>Bruce</i>                      | isotig07779                                                     |
| <i>capsuleen</i>                                                             | 2 | A    | 3725-3816 | <i>csul</i>                       | isotig01229, isotig01228                                        |
| <i>Calmodulin-binding protein related to a Rab3 GDP/GTP exchange protein</i> | 2 | A    | 1233-2207 | <i>Crag</i>                       | isotig07677, isotig09331                                        |
| <i>combgap</i>                                                               | 1 | A    | 3604      | <i>cg</i>                         | isotig08105                                                     |
| <i>Cyclic-AMP response element binding protein A</i>                         | 1 | A    | 3290      | <i>CrebA</i>                      | isotig08237                                                     |
| <i>C-terminal binding protein</i>                                            | 3 | A, S | 239-624   | <i>CtBP</i>                       | isotig16142, GE8SX9M01EF4BJ, FQTBZRY01BYCPR                     |
| <i>cut</i>                                                                   | 1 | S    | 247       | <i>ct</i>                         | FQTBZRY02GRN27                                                  |
| <i>Death related ccd-3/Nedd2-like protein</i>                                | 1 | A    | 2732      | <i>Dredd</i>                      | isotig08688                                                     |
| <i>Ecdysone-induced protein 63E</i>                                          | 2 | A    | 3994-4024 | <i>Eip63E</i>                     | isotig02121, isotig02120                                        |
| <i>ecdysoneless</i>                                                          | 4 | A, S | 372-3069  | <i>ecd</i>                        | isotig17485, isotig19531, GF6CP6CO01D3B2B, isotig08412          |
| <i>eggless</i>                                                               | 2 | A    | 2986-3019 | <i>egg</i>                        | isotig04831, isotig04830                                        |
| <i>extra macrochaetae</i>                                                    | 1 | S    | 201       | <i>emc</i>                        | FQTBZRY02G5SHM                                                  |
| <i>fat facets</i>                                                            | 5 | A    | 1816-3259 | <i>faf</i>                        | isotig01188, isotig01187, isotig01186, isotig01185, isotig01184 |
| <i>fruitless</i>                                                             | 2 | A    | 1313-1618 | <i>fru</i>                        | isotig06010, isotig06009                                        |
| <i>G protein-coupled receptor kinase 2</i>                                   | 1 | A    | 1632      | <i>Gprk2</i>                      | isotig00416                                                     |
| <i>G protein <math>\alpha</math> 47A</i>                                     | 1 | A    | 2901      | <i>G-<math>\alpha</math>47A</i>   | isotig05513                                                     |
| <i>poly U binding factor 68kD</i>                                            | 2 | A    | 3724-3736 | <i>pUf68</i>                      | isotig01566, isotig01567                                        |
| <i>Heat shock factor</i>                                                     | 4 | A    | 3119-3268 | <i>Hsf</i>                        | isotig01705, isotig01704, isotig01703, isotig01702              |
| <i>Heat-shock-protein-70</i>                                                 | 3 | A    | 2209-2595 | <i>Hsp70</i>                      | isotig09115, isotig00207, isotig00208                           |
| <i>Hepatocyte growth factor regulated tyrosine kinase substrate</i>          | 4 | A, S | 344-583   | <i>Hrs</i>                        | isotig16755, GE8SX9M02I536Z, GE8SX9M01EC494, GE8SX9M01BQDQK     |
| <i>hephaestus</i>                                                            | 2 | S    | 201-359   | <i>heph</i>                       | GE8SX9M01A0TGF, FQTBZRY02F9D2F                                  |
| <i>Ice</i>                                                                   | 2 | A    | 1620-1800 | <i>Ice</i>                        | isotig04366, isotig10455                                        |
| <i>jing</i>                                                                  | 2 | S    | 366-427   | <i>jing</i>                       | GF6CP6CO01CJPNC, GE8SX9M02FPBO4                                 |
| <i>jumeau</i>                                                                | 1 | A    | 3251      | <i>jumu</i>                       | isotig08268                                                     |
| <i>leonardo</i>                                                              | 2 | A    | 3053-3220 | <i>14-3-3<math>\zeta</math></i>   | isotig03712, isotig03711                                        |
| <i>lethal (2) giant larvae</i>                                               | 2 | A    | 1879-2573 | <i>l(2)gl</i>                     | contig15364, contig15365                                        |
| <i>Lipid storage droplet-2</i>                                               | 1 | A    | 1861      | <i>Lsd-2</i>                      | isotig06100                                                     |
| <i>Liprin-<math>\alpha</math></i>                                            | 3 | A    | 982-1158  | <i>Liprin-<math>\alpha</math></i> | isotig03903, isotig03902, isotig03901                           |



|                                                  |   |      |           |                   |                                    |
|--------------------------------------------------|---|------|-----------|-------------------|------------------------------------|
| <i>maternal expression at 31B</i>                | 1 | A    | 3408      | <i>me31B</i>      | isotig00511                        |
| <i>Merlin</i>                                    | 1 | A    | 4062      | <i>Mer</i>        | isotig07940                        |
| <i>Methoprene-tolerant</i>                       | 1 | S    | 420       | <i>Met</i>        | GFCP6CO01DP0NH                     |
| <i>microtubule star</i>                          | 1 | A    | 1734      | <i>mts</i>        | isotig00164                        |
| <i>mini spindles</i>                             | 2 | A    | 2315-4784 | <i>msps</i>       | isotig07797, isotig09181           |
| <i>misshapen</i>                                 | 1 | S    | 327       | <i>msn</i>        | GE8SX9M01DYBJ8                     |
| <i>moira</i>                                     | 1 | A    | 2758      | <i>mor</i>        | isotig08664                        |
| <i>Nedd2-like caspase</i>                        | 1 | A    | 2900      | <i>Nc</i>         | isotig03487                        |
| <i>nicastrin</i>                                 | 2 | A    | 2050-1886 | <i>nct</i>        | isotig03085, isotig03084           |
| <i>Niemann-Pick type C-2a</i>                    | 1 | A    | 1095      | <i>Npc2a</i>      | contig15402                        |
|                                                  |   |      |           | <i>Nop60</i>      |                                    |
| <i>Nucleolar protein at 60B</i>                  | 1 | A    | 878       | <i>B</i>          | contig09572                        |
| <i>O-fucosyltransferase 1</i>                    | 1 | A    | 3328      | <i>O-fut1</i>     | isotig08223                        |
| <i>Ornithine decarboxylase antizyme</i>          | 1 | A    | 2621      | <i>Oda</i>        | isotig08802                        |
| <i>PDGF- and VEGF-receptor related</i>           | 1 | A    | 2602      | <i>Pvr</i>        | isotig08816                        |
| <i>pollux</i>                                    | 1 | A    | 3676      | <i>plx</i>        | isotig08081                        |
| <i>polyhomeotic distal</i>                       | 1 | A    | 1608      | <i>ph-d</i>       | isotig10480                        |
| <i>polyhomeotic proximal</i>                     | 1 | S    | 514       | <i>ph-p</i>       | GFCP6CO02H0634                     |
| <i>Presenilin</i>                                | 2 | A    | 1999-3017 | <i>Psn</i>        | isotig03035, isotig03036           |
| <i>Rab-protein 5</i>                             | 2 | A    | 3300-3532 | <i>Rab5</i>       | isotig02948, isotig02947           |
| <i>Rab-protein 11</i>                            | 1 | A    | 2448      | <i>Rab11</i>      | isotig00835                        |
| <i>rotund</i>                                    | 1 | S    | 186       | <i>rn</i>         | FQTBZRY02G28N8                     |
| <i>scribbled</i>                                 | 2 | A, S | 427-696   | <i>scrib</i>      | isotig15514, <b>GE8SX9M01C2HSN</b> |
| <i>skittles</i>                                  | 1 | S    | 311       | <i>sktl</i>       | GE8SX9M01DH70U                     |
| <i>SNF1A/AMP-activated protein kinase</i>        | 1 | A    | 2566      | <i>SNF1A</i>      | isotig05865                        |
| <i>Snf5-related 1</i>                            | 1 | A    | 3127      | <i>Snr1</i>       | isotig08358                        |
| <i>spinster</i>                                  | 1 | A    | 3143      | <i>spin</i>       | isotig00443                        |
| <i>SH2 ankyrin repeat kinase</i>                 | 1 | A    | 3892      | <i>shark</i>      | isotig07997                        |
| <i>strawberry notch</i>                          | 2 | A    | 2330-2459 | <i>sno</i>        | isotig09159, <b>isotig08990</b>    |
| <i>suppressor of Hairy wing</i>                  | 2 | A    | 1790-1907 | <i>su(Hw)</i>     | isotig01368, isotig01367           |
| <i>Suppressor of variegation 3-3</i>             | 2 | A, S | 335-422   | <i>Su(var)3-3</i> | isotig19729, GFCP6CO01BGKBV        |
| <i>Syntaxin 1A</i>                               | 1 | A    | 4416      | <i>Syx1A</i>      | isotig04870                        |
| <i>TATA box binding protein-related factor 2</i> | 2 | A    | 3377-3469 | <i>Trf2</i>       | isotig01886, isotig01885           |
| <i>TBP-associated factor 1</i>                   | 1 | A    | 5541      | <i>Taf1</i>       | isotig04746                        |
| <i>terribly reduced optic lobes</i>              | 1 | A    | 690       | <i>trol</i>       | isotig15574                        |
| <i>Trithorax-like</i>                            | 1 | A    | 1267      | <i>Trl</i>        | isotig11437                        |
| <i>warts</i>                                     | 1 | A    | 734       | <i>wts</i>        | isotig14894                        |
| <i>widerborst</i>                                | 1 | A    | 2141      | <i>wdb</i>        | contig21405                        |

1. Aboïm AN (1945) Développement embryonnaire et post-embryonnaire des gonades normales et agamétiques de *Drosophila melanogaster*. *Revue Suisse de Zoologie* 3: 53-154.
2. Le Bras S, Van Doren M (2006) Development of the male germline stem cell niche in *Drosophila*. *Developmental Biology* 294: 92-103.
3. Nelsen OE (1931) Life cycle, sex differentiation, and testis development in *Melanoplus differentialis* (Acrididae, Orthoptera). *Journal of Morphology* 51: 467-525.
