# Supplementary material for: Developmental Gene Discovery in a Hemimetabolous Insect: De Novo Assembly and Annotation of a Transcriptome for the Cricket Gryllus bimaculatus
Source: PubMed Central journal article supplement (PMC3646015; doi:10.1371/journal.pone.0061479), 2013-05-06
Supplement: pone.0061479.s009.pdf [file pone.0061479.s009.pdf]

Table S6

Selected developmental process genes identified in the *de novo* *G. bimaculatus* transcriptome.

| Process                             | # Hits | Hit ID (A/S) | Length (range) | Query Gene    | Transcriptome Sequence Name(s)                                  |
|-------------------------------------|--------|--------------|----------------|---------------|-----------------------------------------------------------------|
| <b>MATERNAL GENES</b>               |        |              |                |               |                                                                 |
| <b>ANTERIOR GROUP</b>               |        |              |                |               |                                                                 |
| <i>bicoid interacting protein 1</i> | 1      | A            | 1040           | <i>Bin1</i>   | isotig03457                                                     |
| <i>exuperantia</i>                  | 2      | A            | 3152-3225      | <i>exu</i>    | isotig04765, isotig04764                                        |
| <i>staufen</i>                      | 3      | A            | 1287-1442      | <i>stau</i>   | isotig03172, isotig03173, isotig03174                           |
| <b>POSTERIOR GROUP</b>              |        |              |                |               |                                                                 |
| <i>armitage</i>                     | 1      | A            | 4095           | <i>armi</i>   | isotig07934                                                     |
| <i>Bruno</i>                        | 1      | A            | 1676           | <i>aret</i>   | isotig10307                                                     |
| <i>cappuccino</i>                   | 2      | A            | 817-866        | <i>capu</i>   | isotig06798, isotig06799                                        |
| <i>fat facets</i>                   | 5      | A            | 1816-3259      | <i>faf</i>    | isotig01188, isotig01187, isotig01186, isotig01185, isotig01184 |
| <i>Moesin</i>                       | 1      | A            | 4272           | <i>Moe</i>    | isotig00886                                                     |
| <i>mago nashi</i>                   | 1      | A            | 1021           | <i>mago</i>   | isotig12375                                                     |
| <i>par-1</i>                        | 1      | A            | 889            | <i>par-1</i>  | isotig07610                                                     |
| <i>pipsqueak</i>                    | 2      | A, S         | 337-430        | <i>psq</i>    | isotig19171, <b>GFCP6CO01CETJB</b>                              |
| <i>pumilio</i>                      | 3      | A, S         | 412-624        | <i>pum</i>    | isotig04477, isotig04476, GFJY65E02G1R75                        |
| <i>orb</i>                          | 1      | A            | 4765           | <i>orb</i>    | isotig00462                                                     |
| <i>Rabenosyn-5</i>                  | 1      | A            | 1853           | <i>Rbsn-5</i> | isotig09916                                                     |
| <i>staufen</i>                      | 3      | A            | 1287-1442      | <i>stau</i>   | isotig03172, isotig03173, isotig03174                           |
| <i>tudor</i>                        | 2      | A            | 4146-5784      | <i>tud</i>    | isotig07719, isotig07925                                        |
| <i>vasa</i>                         | 2      | A            | 765-1146       | <i>vas</i>    | isotig14543, <b>isotig11874</b>                                 |
| <i>ypsilon schachtel</i>            | 1      | A            | 2601           | <i>yps</i>    | isotig03079                                                     |
| <b>TERMINAL GROUP</b>               |        |              |                |               |                                                                 |
| <i>capicua</i>                      | 2      | S            | 314-438        | <i>cic</i>    | GE8SX9M02IXJOG, GE8SX9M01D8UIJ                                  |

|                                      |   |      |           |               |                                                                                                                                                                                                                        |
|--------------------------------------|---|------|-----------|---------------|------------------------------------------------------------------------------------------------------------------------------------------------------------------------------------------------------------------------|
| <i>corkscrew</i>                     | 1 | S    | 266       | <i>csw</i>    | GE8SX9M02G96K3                                                                                                                                                                                                         |
| <i>pole hole</i>                     | 1 | A    | 4282      | <i>phl</i>    | isotig07892                                                                                                                                                                                                            |
| <i>Ras oncogene at 85D</i>           | 2 | A    | 2078-2467 | <i>Ras85D</i> | isotig09494, isotig08979                                                                                                                                                                                               |
| <i>rolled</i>                        | 1 | A    | 799       | <i>rl</i>     | isotig14164                                                                                                                                                                                                            |
| <i>torso-like</i>                    | 1 | S    | 174       | <i>ts1</i>    | GFCP6CO02G92YK                                                                                                                                                                                                         |
| <b>DORSAL GROUP</b>                  |   |      |           |               |                                                                                                                                                                                                                        |
| <i>cactus</i>                        | 4 | A    | 3168-4301 | <i>cact</i>   | isotig02364, isotig02362, isotig02363, isotig02361                                                                                                                                                                     |
| <i>cappuccino</i>                    | 2 | A    | 817-866   | <i>capu</i>   | isotig06798, isotig06799                                                                                                                                                                                               |
| <i>cornichon</i>                     | 1 | A    | 1733      | <i>cni</i>    | isotig05694                                                                                                                                                                                                            |
| <i>capicua</i>                       | 2 | S    | 314-438   | <i>cic</i>    | GE8SX9M02IXJOG, GE8SX9M01D8UIJ                                                                                                                                                                                         |
| <i>dorsal</i>                        | 5 | A, S | 325-810   | <i>dl</i>     | isotig14031, <a href="#">GE8SX9M02HRGAV</a> , <a href="#">GFJY65E02GK63W</a> ,<br><a href="#">GFJY65E02FIMPE</a> , <a href="#">GE8SX9M01CGCYQ</a>                                                                      |
| <i>Egfr</i>                          | 1 | A    | 1099      | <i>Egfr</i>   | isotig12088                                                                                                                                                                                                            |
| <i>gastrulation-defective</i>        | 1 | A    | 862       | <i>gd</i>     | isotig13529                                                                                                                                                                                                            |
| <i>Myd88</i>                         | 1 | A    | 2079      | <i>Myd88</i>  | isotig09497                                                                                                                                                                                                            |
| <i>orb</i>                           | 1 | A    | 4765      | <i>orb</i>    | isotig00462                                                                                                                                                                                                            |
| <i>pelle</i>                         | 2 | A    | 3507-4221 | <i>pll</i>    | isotig02382, isotig02381                                                                                                                                                                                               |
| <i>pipe</i>                          | 1 | A    | 6608      | <i>pip</i>    | isotig07697                                                                                                                                                                                                            |
| <i>spatzle</i>                       | 1 | A    | 2006      | <i>spz</i>    | isotig09642                                                                                                                                                                                                            |
| <i>squid</i>                         | 1 | A    | 1546      | <i>sqd</i>    | isotig00544                                                                                                                                                                                                            |
| <i>Toll</i>                          | 1 | A    | 2125      | <i>Tl</i>     | isotig09438                                                                                                                                                                                                            |
| <i>zucchini</i>                      | 1 | A    | 1455      | <i>zuc</i>    | isotig00915                                                                                                                                                                                                            |
| <b>ZYGOTICALLY TRANSCRIBED GENES</b> |   |      |           |               |                                                                                                                                                                                                                        |
| <i>cap-n-collar</i>                  | 2 | A    | 1549-2281 | <i>cnc</i>    | isotig05578, isotig05577                                                                                                                                                                                               |
| <i>crocodile</i>                     | 2 | A    | 890-966   | <i>croc</i>   | isotig06650, isotig06649                                                                                                                                                                                               |
| <i>Tenascin major</i>                | 7 | A, S | 200-833   | <i>Ten-m</i>  | GFJY65E01CUG9F, <a href="#">GE8SX9M01AOG18</a> ,<br><a href="#">GFCP6CO01DGZ87</a> , <a href="#">FQTBZRY01EVWST</a> ,<br><a href="#">GFCP6CO02HATIX</a> , <a href="#">GFCP6CO02G16S1</a> , <a href="#">isotig13797</a> |
| <i>C-terminal binding protein</i>    | 3 | A, S | 239-624   | <i>CtBP</i>   | isotig16142, GE8SX9M01EF4BJ, FQTBZRY01BYCPR                                                                                                                                                                            |
| <i>domeless</i>                      | 1 | A    | 927       | <i>dome</i>   | isotig12992                                                                                                                                                                                                            |
| <i>eyelid</i>                        | 1 | A    | 2298      | <i>osa</i>    | isotig09196                                                                                                                                                                                                            |
| <i>ftz transcription factor 1</i>    | 1 | S    | 397       | <i>ftz-f1</i> | GFCP6CO02HU50W                                                                                                                                                                                                         |
| <i>hopscotch</i>                     | 1 | A    | 2719      | <i>hop</i>    | isotig04276                                                                                                                                                                                                            |

|                      |   |   |      |                |             |
|----------------------|---|---|------|----------------|-------------|
| <i>marelle</i>       | 1 | A | 2243 | <i>Stat92E</i> | isotig03185 |
| <i>Rpd3</i>          | 1 | A | 2212 | <i>Rpd3</i>    | isotig09325 |
| <i>shuttle craft</i> | 1 | A | 4369 | <i>stc</i>     | isotig07864 |
| <i>Sir2</i>          | 1 | A | 2334 | <i>Sir2</i>    | contig14671 |
| <i>squid</i>         | 1 | A | 1546 | <i>sqd</i>     | isotig00544 |

---
